# Supplementary material for: Ion Transport Modulators as Antimycobacterial Agents
Source: Hindawi journal article supplement (doi:10.1155/2020/3767915), 2020-11-20
Supplement: f1 [file 3767915.f1.zip]

Table S2: Effects of test drugs on antimycobacterial activity of rifampicin against intracellular and extracellular *M. bovis* BCG following treatment for 3, 6 or 9 days

| Drug                       | CFU/ml for extracellular bacteria on day 3 | CFU/ml for extracellular bacteria on day 6 | CFU/ml for extracellular bacteria on day 9 | CFU/ml for intracellular bacteria on day 3 | CFU/ml for intracellular bacteria on day 6 | CFU/ml for intracellular bacteria on day 9 |
|----------------------------|--------------------------------------------|--------------------------------------------|--------------------------------------------|--------------------------------------------|--------------------------------------------|--------------------------------------------|
| Ambroxol HCl + Rifampicin  | 287995                                     | 132705                                     | 11595                                      | 163370                                     | 75310                                      | 21325                                      |
| Ambroxol HCl + Rifampicin  | 279650                                     | 132785                                     | 6340                                       | 180780                                     | 70805                                      | 23355                                      |
| Ambroxol HCl + Rifampicin  | 269025                                     | 140970                                     | 8830                                       | 174475                                     | 85100                                      | 26195                                      |
| Ambroxol HCl + Rifampicin  | 275395                                     | 131335                                     | 15150                                      | 177600                                     | 78995                                      | 24975                                      |
| Ambroxol HCl + Rifampicin  | 276770                                     | 128055                                     | 11475                                      | 184365                                     | 69395                                      | 24310                                      |
| Ambroxol HCl + Rifampicin  | 271185                                     | 125360                                     | 7455                                       | 176170                                     | 72790                                      | 25110                                      |
| Amiloride HCl + Rifampicin | 213230                                     | 117265                                     | 9140                                       | 180635                                     | 76500                                      | 27995                                      |
| Amiloride HCl + Rifampicin | 192940                                     | 117015                                     | 4605                                       | 182880                                     | 82910                                      | 28640                                      |
| Amiloride HCl + Rifampicin | 274080                                     | 116750                                     | 9325                                       | 168915                                     | 78695                                      | 29545                                      |
| Amiloride HCl + Rifampicin | 215435                                     | 109595                                     | 4665                                       | 158105                                     | 80310                                      | 30105                                      |
| Amiloride HCl + Rifampicin | 213650                                     | 106215                                     | 17420                                      | 164945                                     | 76180                                      | 29785                                      |
| Amiloride HCl + Rifampicin | 214195                                     | 117365                                     | 6480                                       | 192490                                     | 78200                                      | 29595                                      |
| Diazoxide + Rifampicin     | 272885                                     | 131810                                     | 10475                                      | 164905                                     | 60900                                      | 23825                                      |
| Diazoxide + Rifampicin     | 251685                                     | 119120                                     | 5970                                       | 170085                                     | 62660                                      | 23545                                      |
| Diazoxide + Rifampicin     | 223765                                     | 120500                                     | 405                                        | 187395                                     | 65445                                      | 25140                                      |
| Diazoxide + Rifampicin     | 300525                                     | 130410                                     | 5600                                       | 165425                                     | 56040                                      | 24895                                      |
| Diazoxide + Rifampicin     | 244350                                     | 137630                                     | 5995                                       | 181960                                     | 67040                                      | 24700                                      |
| Diazoxide + Rifampicin     | 293260                                     | 116885                                     | 2165                                       | 161215                                     | 53875                                      | 24455                                      |
| Digoxin + Rifampicin       | 257185                                     | 99310                                      | 4255                                       | 171175                                     | 53695                                      | 24850                                      |
| Digoxin + Rifampicin       | 227395                                     | 98515                                      | 3460                                       | 177205                                     | 53560                                      | 25180                                      |
| Digoxin + Rifampicin       | 221255                                     | 98785                                      | 11205                                      | 172500                                     | 52980                                      | 25310                                      |
| Digoxin + Rifampicin       | 266555                                     | 108090                                     | 520                                        | 178415                                     | 51975                                      | 25165                                      |
| Digoxin + Rifampicin       | 228505                                     | 118280                                     | 7815                                       | 184955                                     | 54400                                      | 25650                                      |
| Digoxin + Rifampicin       | 251865                                     | 96785                                      | 4085                                       | 183540                                     | 51120                                      | 25355                                      |
| Furosemide + Rifampicin    | 224395                                     | 93235                                      | 8250                                       | 190395                                     | 69360                                      | 23685                                      |
| Furosemide + Rifampicin    | 206050                                     | 86480                                      | 18745                                      | 158085                                     | 69500                                      | 22730                                      |
| Furosemide + Rifampicin    | 198510                                     | 92115                                      | 2490                                       | 183050                                     | 78775                                      | 25035                                      |
| Furosemide + Rifampicin    | 220845                                     | 101605                                     | 2530                                       | 183730                                     | 82000                                      | 24285                                      |
| Furosemide + Rifampicin    | 258515                                     | 101955                                     | 15435                                      | 158855                                     | 84035                                      | 24555                                      |
| Furosemide + Rifampicin    | 273790                                     | 83120                                      | 13560                                      | 160105                                     | 79755                                      | 23835                                      |
| HCTZ + Rifampicin          | 239540                                     | 104305                                     | 3060                                       | 160030                                     | 49060                                      | 26585                                      |
| HCTZ + Rifampicin          | 208550                                     | 108010                                     | 6100                                       | 181200                                     | 62550                                      | 26210                                      |
| HCTZ + Rifampicin          | 209355                                     | 105470                                     | 3115                                       | 158660                                     | 56185                                      | 26640                                      |
| HCTZ + Rifampicin          | 190205                                     | 113155                                     | 2575                                       | 170305                                     | 57880                                      | 27235                                      |
| HCTZ + Rifampicin          | 189955                                     | 112975                                     | 3610                                       | 175350                                     | 62890                                      | 26585                                      |
| HCTZ + Rifampicin          | 301210                                     | 100945                                     | 6620                                       | 160380                                     | 54365                                      | 26045                                      |
| Metformin + Rifampicin     | 218330                                     | 101310                                     | 3850                                       | 166675                                     | 76175                                      | 28835                                      |
| Metformin + Rifampicin     | 210260                                     | 105785                                     | 1400                                       | 176515                                     | 80725                                      | 28595                                      |
| Metformin + Rifampicin     | 238195                                     | 105085                                     | 19215                                      | 188995                                     | 70630                                      | 28690                                      |
| Metformin + Rifampicin     | 200950                                     | 94435                                      | 17025                                      | 164320                                     | 80200                                      | 28865                                      |
| Metformin + Rifampicin     | 199475                                     | 96630                                      | 13125                                      | 192145                                     | 81515                                      | 29535                                      |
| Metformin + Rifampicin     | 212280                                     | 91650                                      | 3340                                       | 176150                                     | 79130                                      | 29625                                      |
| Omeprazole + Rifampicin    | 268075                                     | 121445                                     | 6220                                       | 171935                                     | 63485                                      | 23785                                      |
| Omeprazole + Rifampicin    | 275560                                     | 121570                                     | 9515                                       | 180645                                     | 65240                                      | 22155                                      |
| Omeprazole + Rifampicin    | 252785                                     | 117580                                     | 6670                                       | 174720                                     | 67655                                      | 23820                                      |

|                           |        |        |       |        |       |       |
|---------------------------|--------|--------|-------|--------|-------|-------|
| Omeprazole + Rifampicin   | 257330 | 103620 | 19025 | 158970 | 67075 | 23865 |
| Omeprazole + Rifampicin   | 255880 | 111370 | 5040  | 180305 | 64835 | 22110 |
| Omeprazole + Rifampicin   | 239745 | 99000  | 1790  | 192600 | 65340 | 23055 |
| Pantoprazole + Rifampicin | 250750 | 123950 | 2335  | 162835 | 56335 | 18385 |
| Pantoprazole + Rifampicin | 237670 | 129410 | 5870  | 157970 | 62345 | 18375 |
| Pantoprazole + Rifampicin | 224325 | 122990 | 1980  | 192460 | 59135 | 17870 |
| Pantoprazole + Rifampicin | 196990 | 109410 | 9860  | 184970 | 57930 | 18265 |
| Pantoprazole + Rifampicin | 177810 | 113735 | 840   | 176100 | 60675 | 17820 |
| Pantoprazole + Rifampicin | 168160 | 109535 | 19805 | 192260 | 63725 | 17990 |
| Phenytoin + Rifampicin    | 161320 | 104795 | 11970 | 168945 | 60090 | 30735 |
| Phenytoin + Rifampicin    | 176740 | 110560 | 16705 | 160205 | 60035 | 30360 |
| Phenytoin + Rifampicin    | 193960 | 85615  | 2050  | 183860 | 57950 | 30125 |
| Phenytoin + Rifampicin    | 268495 | 84305  | 3415  | 163240 | 59765 | 30475 |
| Phenytoin + Rifampicin    | 262140 | 104595 | 1500  | 176815 | 64285 | 31115 |
| Phenytoin + Rifampicin    | 162505 | 132235 | 19835 | 180200 | 61250 | 29750 |
| Rifampicin                | 299080 | 169875 | 19310 | 161810 | 75195 | 29605 |
| Rifampicin                | 308360 | 172150 | 22205 | 171625 | 85355 | 30160 |
| Rifampicin                | 307380 | 169495 | 25855 | 172000 | 82500 | 30405 |
| Rifampicin                | 315155 | 175630 | 9655  | 161430 | 70320 | 30355 |
| Rifampicin                | 299500 | 143030 | 11990 | 192360 | 86385 | 28935 |
| Rifampicin                | 292205 | 184425 | 15745 | 168205 | 72900 | 29000 |
| Verapamil + Rifampicin    | 266085 | 110240 | 3860  | 185105 | 46995 | 30060 |
| Verapamil + Rifampicin    | 253720 | 106810 | 6870  | 191300 | 54595 | 30815 |
| Verapamil + Rifampicin    | 240110 | 110695 | 5885  | 191485 | 47100 | 30875 |
| Verapamil + Rifampicin    | 235405 | 118190 | 5350  | 180075 | 56825 | 29920 |
| Verapamil + Rifampicin    | 229500 | 119545 | 19755 | 181880 | 52980 | 30210 |
| Verapamil + Rifampicin    | 227745 | 119435 | 1945  | 165375 | 46200 | 30295 |
| X + Rifampicin            | 227846 | 114910 | 16865 | 186536 | 84777 | 23242 |
| X + Rifampicin            | 231792 | 106550 | 4427  | 188602 | 70618 | 23034 |
| X + Rifampicin            | 263308 | 109265 | 16622 | 174661 | 80688 | 23509 |
| X + Rifampicin            | 231091 | 121770 | 6370  | 170075 | 77193 | 24059 |
| X + Rifampicin            | 219938 | 121009 | 7759  | 167677 | 81297 | 24089 |
| X + Rifampicin            | 191682 | 105346 | 20474 | 185877 | 73942 | 24110 |
| Y + Rifampicin            | 256467 | 104747 | 11330 | 165399 | 60461 | 27003 |
| Y + Rifampicin            | 158982 | 100094 | 508   | 170575 | 62706 | 27637 |
| Y + Rifampicin            | 152959 | 98761  | 1230  | 164611 | 66110 | 27114 |
| Y + Rifampicin            | 182560 | 108628 | 9756  | 174585 | 59947 | 28016 |
| Y + Rifampicin            | 196140 | 96759  | 1821  | 176879 | 61263 | 25198 |
| Y + Rifampicin            | 167869 | 120718 | 4326  | 169773 | 68569 | 27134 |
