# Supplementary material for: Ion Transport Modulators as Antimycobacterial Agents
Source: Hindawi journal article supplement (doi:10.1155/2020/3767915), 2020-11-20
Supplement: f1 [file 3767915.f1.zip]

Table S1: Effects of test drugs on intracellular and extracellular *M. bovis* BCG following treatment for 3, 6 or 9 days

| Drug          | CFU/ml for extracellular bacteria on day 3 | CFU/ml for extracellular bacteria on day 6 | CFU/ml for extracellular bacteria on day 9 | CFU/ml for intracellular bacteria on day 3 | CFU/ml for intracellular bacteria on day 6 | CFU/ml for intracellular bacteria on day 9 |
|---------------|--------------------------------------------|--------------------------------------------|--------------------------------------------|--------------------------------------------|--------------------------------------------|--------------------------------------------|
| Ambroxol HCl  | 5528250                                    | 58042690                                   | 454939645                                  | 2726710                                    | 24239755                                   | 61586965                                   |
| Ambroxol HCl  | 6868505                                    | 59968060                                   | 458912250                                  | 2718405                                    | 22716320                                   | 62670565                                   |
| Ambroxol HCl  | 5819700                                    | 51891770                                   | 490317565                                  | 2706525                                    | 22891090                                   | 62311115                                   |
| Ambroxol HCl  | 5983620                                    | 52392315                                   | 464198600                                  | 2616855                                    | 20879345                                   | 65537675                                   |
| Ambroxol HCl  | 5703565                                    | 56352445                                   | 544932860                                  | 2627715                                    | 24235565                                   | 62738815                                   |
| Ambroxol HCl  | 5984450                                    | 60794540                                   | 546622000                                  | 2894830                                    | 23775680                                   | 62497665                                   |
| Amiloride HCl | 7663925                                    | 59020795                                   | 369459195                                  | 2539425                                    | 20229985                                   | 66327275                                   |
| Amiloride HCl | 7603165                                    | 59148795                                   | 405401595                                  | 3345525                                    | 20603205                                   | 67262475                                   |
| Amiloride HCl | 7773455                                    | 59590395                                   | 418559995                                  | 3129335                                    | 20595730                                   | 66865575                                   |
| Amiloride HCl | 8410650                                    | 56883195                                   | 338687995                                  | 2674175                                    | 19823375                                   | 64999375                                   |
| Amiloride HCl | 8318710                                    | 59052795                                   | 389836795                                  | 2890030                                    | 16515900                                   | 64385740                                   |
| Amiloride HCl | 8160410                                    | 57619195                                   | 399001595                                  | 2929005                                    | 21652700                                   | 69230090                                   |
| Diazoxide     | 8218775                                    | 57439995                                   | 433561595                                  | 2661890                                    | 12554955                                   | 41799625                                   |
| Diazoxide     | 8284330                                    | 58412795                                   | 424396795                                  | 2720525                                    | 11677390                                   | 41328790                                   |
| Diazoxide     | 8244355                                    | 53375995                                   | 423526395                                  | 2998500                                    | 11066050                                   | 40855325                                   |
| Diazoxide     | 8168405                                    | 59283195                                   | 404940795                                  | 3039020                                    | 9649250                                    | 46092115                                   |
| Diazoxide     | 7884585                                    | 52339195                                   | 400025595                                  | 3132825                                    | 10555350                                   | 46212425                                   |
| Diazoxide     | 8168405                                    | 50969595                                   | 406067195                                  | 2995980                                    | 9068685                                    | 42753115                                   |
| Digoxin       | 7739080                                    | 4544000                                    | 229376000                                  | 2608900                                    | 19320965                                   | 53970265                                   |
| Digoxin       | 7651135                                    | 35263995                                   | 259071995                                  | 2821030                                    | 21698600                                   | 52839675                                   |
| Digoxin       | 7275375                                    | 26944000                                   | 212480000                                  | 2903860                                    | 1865090                                    | 54602540                                   |
| Digoxin       | 8754430                                    | 27520000                                   | 203264000                                  | 2928410                                    | 16693355                                   | 55028575                                   |
| Digoxin       | 7003545                                    | 34943995                                   | 28160000                                   | 2724310                                    | 14224315                                   | 52727240                                   |
| Digoxin       | 7179435                                    | 28480000                                   | 215552000                                  | 2689595                                    | 13844140                                   | 51219090                                   |
| Drug-Free     | 9171245                                    | 58765185                                   | 529334730                                  | 2987365                                    | 23180030                                   | 87800310                                   |
| Drug-Free     | 8613050                                    | 55064890                                   | 482135905                                  | 2555165                                    | 20816845                                   | 83902570                                   |
| Drug-Free     | 7534140                                    | 83513015                                   | 539863135                                  | 2857470                                    | 22065235                                   | 88288205                                   |
| Drug-Free     | 7241365                                    | 70020610                                   | 474733360                                  | 2710970                                    | 23679465                                   | 86208290                                   |
| Drug-Free     | 6657845                                    | 57899470                                   | 523347400                                  | 2849215                                    | 21568895                                   | 110586965                                  |
| Drug-Free     | 8751840                                    | 58736785                                   | 522585390                                  | 2839820                                    | 21951640                                   | 87678105                                   |
| Furosemide    | 10649225                                   | 45119995                                   | 29184000                                   | 2800765                                    | 12736930                                   | 51720725                                   |
| Furosemide    | 10545295                                   | 5760000                                    | 261119995                                  | 2758915                                    | 14457140                                   | 51221365                                   |
| Furosemide    | 9002275                                    | 38079995                                   | 254976000                                  | 2583595                                    | 16522645                                   | 50506400                                   |
| Furosemide    | 11752525                                   | 46015995                                   | 182784000                                  | 2732700                                    | 17845520                                   | 50631000                                   |
| Furosemide    | 9218135                                    | 52095995                                   | 211968000                                  | 3077770                                    | 18846735                                   | 49109200                                   |
| Furosemide    | 10193515                                   | 54591995                                   | 214016000                                  | 2970055                                    | 15408155                                   | 50279950                                   |
| HCTZ          | 7996515                                    | 58489595                                   | 455014395                                  | 2720890                                    | 10023440                                   | 45528965                                   |
| HCTZ          | 8050080                                    | 58739195                                   | 460134395                                  | 2633100                                    | 9527550                                    | 45419240                                   |
| HCTZ          | 7619155                                    | 57241595                                   | 444159995                                  | 2631825                                    | 10223315                                   | 44672075                                   |
| HCTZ          | 8476210                                    | 54284795                                   | 514611195                                  | 2699410                                    | 11198050                                   | 44465490                                   |
| HCTZ          | 7814230                                    | 57478395                                   | 442572795                                  | 2713755                                    | 10464070                                   | 43376815                                   |
| HCTZ          | 7866195                                    | 56121595                                   | 428390395                                  | 2788450                                    | 10792900                                   | 43015700                                   |
| Metformin     | 7041585                                    | 50955835                                   | 516905780                                  | 2811485                                    | 19565950                                   | 54412225                                   |

|              |             |             |             |             |            |            |
|--------------|-------------|-------------|-------------|-------------|------------|------------|
| Metformin    | 6162815     | 57791255    | 480339195   | 2635685     | 21975415   | 72767715   |
| Metformin    | 6240605     | 55684285    | 513371110   | 2688880     | 23775985   | 61612075   |
| Metformin    | 6854890     | 55842620    | 504456240   | 2626695     | 21195340   | 53965365   |
| Metformin    | 6360905     | 56869310    | 497136685   | 2850305     | 24316150   | 70643125   |
| Metformin    | 6575665     | 54932285    | 480182780   | 2708060     | 22826665   | 58349290   |
| Omeprazole   | 8666490     | 54425595    | 490239995   | 2796915     | 17688115   | 66638165   |
| Omeprazole   | 8185995     | 57177595    | 493414395   | 2905765     | 18244015   | 66333225   |
| Omeprazole   | 7677515     | 54764795    | 461311995   | 3023820     | 18459840   | 68930140   |
| Omeprazole   | 7463255     | 63187195    | 474419195   | 2843595     | 17358050   | 68194350   |
| Omeprazole   | 7424080     | 62604795    | 462591995   | 2943120     | 16817270   | 69102775   |
| Omeprazole   | 7489635     | 62649595    | 443596795   | 2750390     | 17320980   | 67211200   |
| Pantoprazole | 8092455     | 63116795    | 500223995   | 2789965     | 23117385   | 86966905   |
| Pantoprazole | 7880590     | 63494395    | 502271995   | 3135670     | 21612140   | 90437970   |
| Pantoprazole | 7982125     | 62412795    | 483481595   | 2667730     | 22749785   | 88714930   |
| Pantoprazole | 8468215     | 64838395    | 603699195   | 3095735     | 20983490   | 83939075   |
| Pantoprazole | 7805435     | 62636795    | 450201595   | 2536255     | 23203690   | 95510015   |
| Pantoprazole | 8277135     | 61548795    | 429823995   | 2608120     | 20720185   | 84179980   |
| Phenytoin    | 9521945     | 18496000    | 325119995   | 3069460     | 9929540    | 27365365   |
| Phenytoin    | 8850370     | 65087995    | 364031995   | 2789875     | 11037960   | 29714650   |
| Phenytoin    | 8106845     | 73535995    | 276479995   | 3102545     | 11784885   | 28857065   |
| Phenytoin    | 14462800    | 23808000    | 301567995   | 2979190     | 11612295   | 28391475   |
| Phenytoin    | 9545930     | 61951995    | 235520000   | 2644080     | 10800610   | 28972215   |
| Phenytoin    | 9026260     | 68671995    | 245760000   | 2961735     | 10235165   | 28912100   |
| Verapamil    | 8034890     | 55097595    | 401612795   | 3024100     | 17032130   | 50571065   |
| Verapamil    | 7560790     | 54239995    | 358860795   | 3019560     | 18929345   | 50946350   |
| Verapamil    | 8070065     | 52390395    | 374783995   | 2733820     | 18188865   | 48044850   |
| Verapamil    | 7473645     | 46188795    | 457420795   | 2752450     | 17564960   | 51975875   |
| Verapamil    | 7472050     | 41465595    | 348211195   | 2918965     | 18110020   | 49546875   |
| Verapamil    | 7911770     | 43468795    | 367615995   | 3074485     | 16931960   | 50979340   |
| Drug X       | 7498430.779 | 64185594.99 | 552140794.6 | 2955786.4   | 15478041.6 | 44923462.5 |
| Drug X       | 7900575.003 | 62067195.15 | 512460795   | 2773256.668 | 15894592   | 45512075   |
| Drug X       | 7902173.986 | 61926395.16 | 504063995.1 | 2985645.32  | 15380668.8 | 46534425   |
| Drug X       | 8807198.364 | 61644795.18 | 476518395.3 | 2755891.04  | 13705484.8 | 43632050   |
| Drug X       | 8189191.435 | 62489595.12 | 422041595.9 | 2774683.072 | 13386553.6 | 44873062.5 |
| Drug X       | 8208379.231 | 67865594.7  | 611225594   | 2484190.8   | 13160291.2 | 43754287.5 |
| Drug Y       | 8210777.705 | 21567998.32 | 288255997.2 | 2796624.628 | 10930438.4 | 44174462.5 |
| Drug Y       | 10889074.23 | 24447998.09 | 32767999.68 | 2962017.8   | 10518883.2 | 44323562.5 |
| Drug Y       | 10657221.7  | 20287998.42 | 238591997.7 | 2603968.92  | 10613657.6 | 44386212.5 |
| Drug Y       | 10881079.32 | 25023998.05 | 27647999.73 | 2754586.24  | 11626809.6 | 43562750   |
| Drug Y       | 7267377.735 | 40319996.85 | 317951996.9 | 2669500.4   | 11655324.8 | 43377687.5 |
| Drug Y       | 7667123.485 | 19071998.51 | 30719999.7  | 2597986.44  | 13759468.8 | 43614725   |
