# Supplementary material for: Ion Transport Modulators as Antimycobacterial Agents
Source: Hindawi journal article supplement (doi:10.1155/2020/3767915), 2020-11-20
Supplement: f1 [file 3767915.f1.zip]

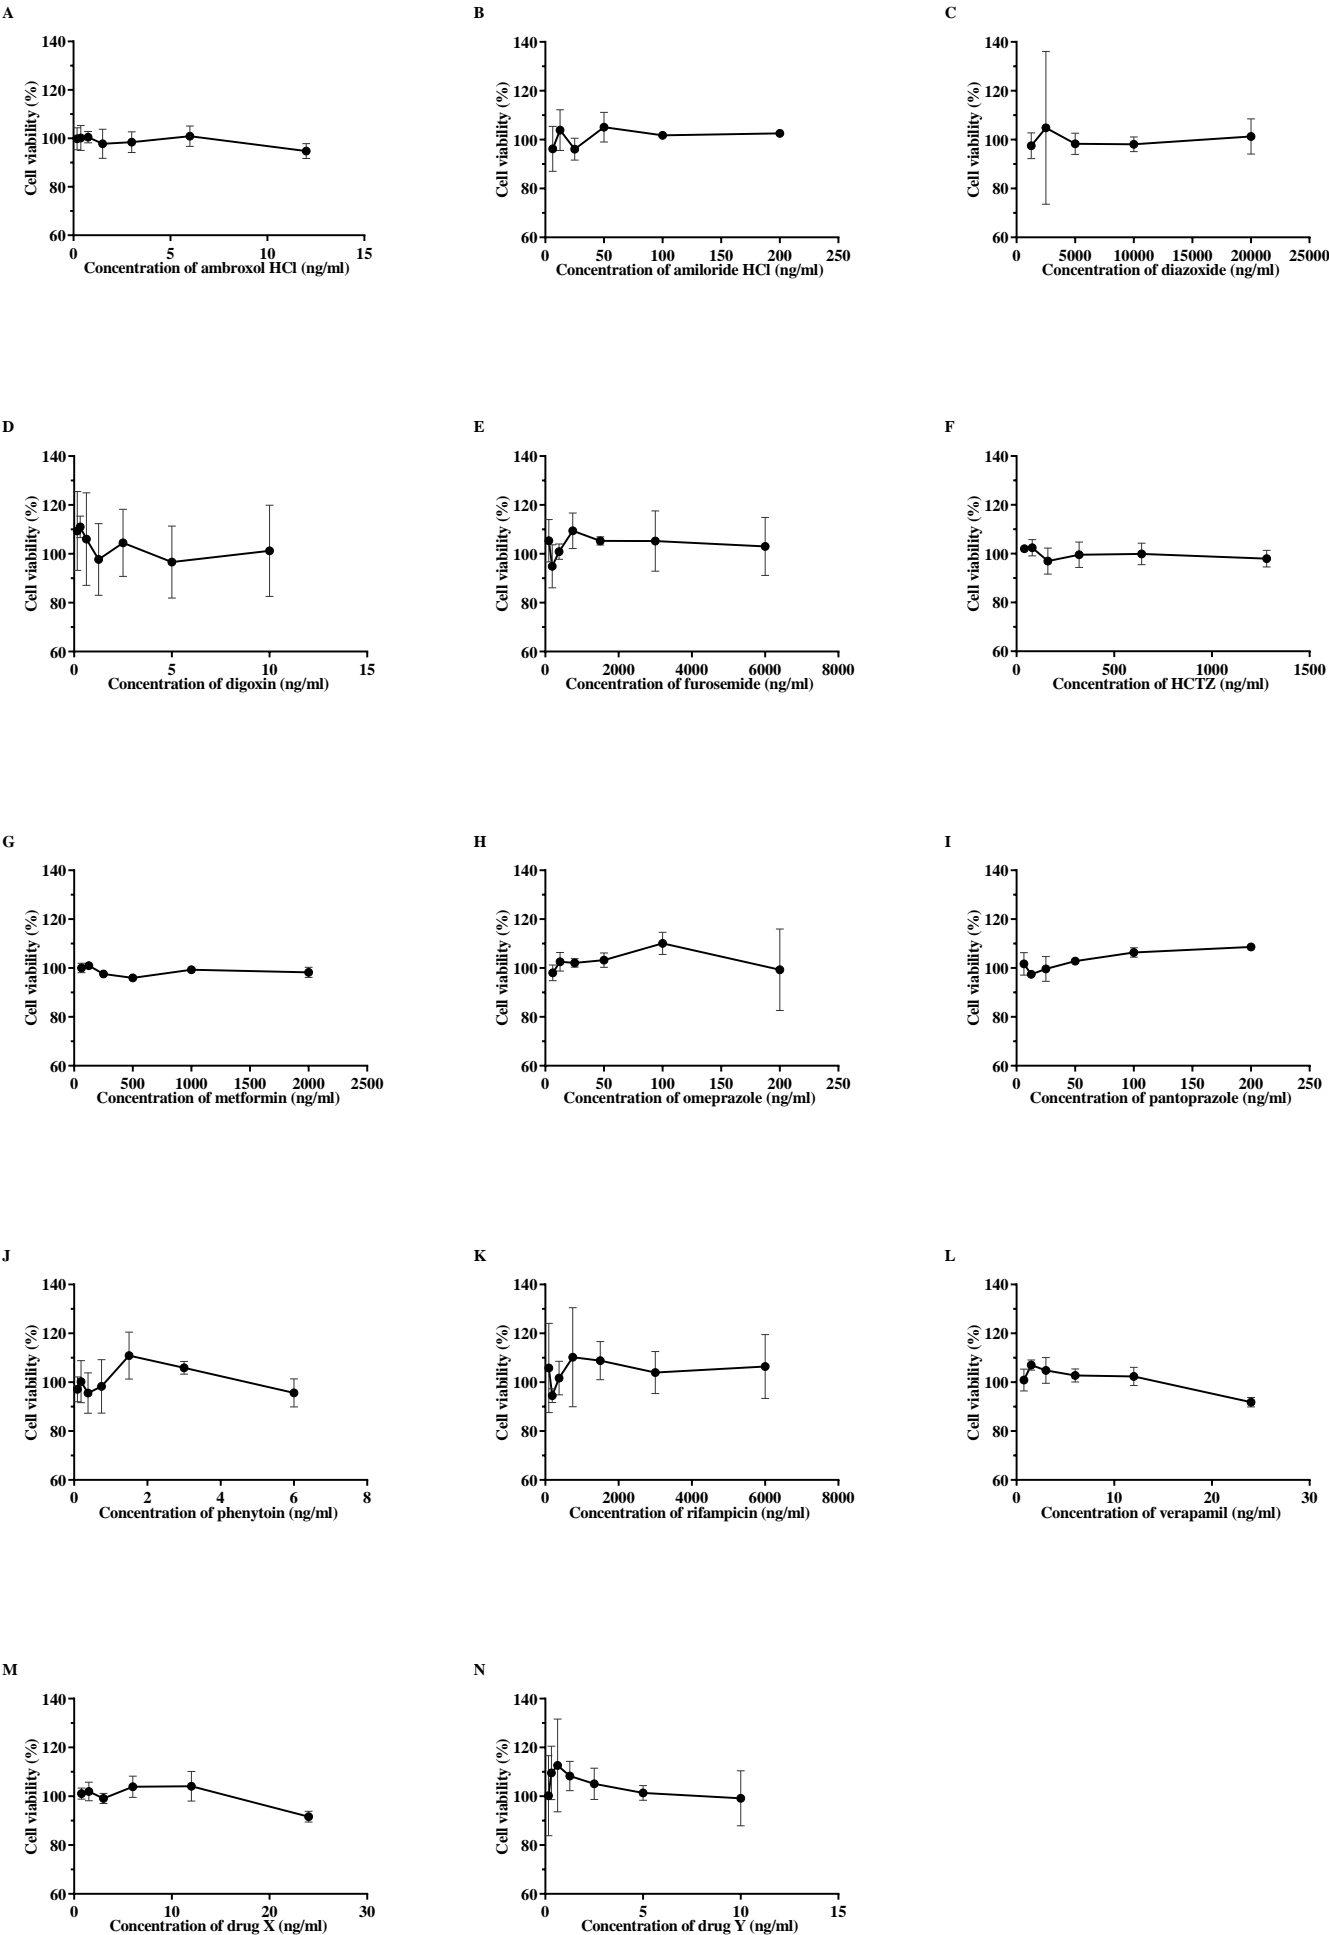

**Figure S1: Mean (+SD) viability of THP-1 derived macrophages following exposure to different concentrations of test drugs. HCTZ, hydrochlorothiazide**
