# Supplementary material for: Ion Transport Modulators as Antimycobacterial Agents
Source: Tuberc Res Treat. 2020 Nov 20;2020:3767915. doi: 10.1155/2020/3767915 (PMC7700046; doi:10.1155/2020/3767915)
Supplement: Supplementary Materials — Figure S1: mean (+SD) viability of THP-1 derived macrophages following exposure to different concentrations of test drugs. Table S1: effects of test drugs on intracellular and extracellular M. bovis BCG following treatment for 3, 6, or 9 days. Table S2: effects of test drugs on antimycobacterial activity of rifampicin against intracellular and extracellular M. bovis BCG following treatment for 3, 6, or 9 days. [file 3767915.f1.zip]

Archive with 3 entries (3 files):
- Figure S1.pdf
- Table S1.pdf
- Table S2.pdf
